# Supplementary material for: Adolescent public stigma and help seeking intention are associated with later service use: A five-year follow-up study using annual self-report surveys and medical records
Source: Research Square preprint supplement (doi:10.21203/rs.3.rs-6425632/v1), 2025-11-28
Supplement: Supplementary file 2 [file db0c990c67e391c58d019ce2.docx]

# **Table 1. Demographic characteristics of the study participants**

|  | Total | | | Respondents | | No respondents | | *p* value |
| --- | --- | --- | --- | --- | --- | --- | --- | --- |
| n | 3,088 |  | 1,919 | |  | 1,169 |  |  |
| Female (n, %) | 608 | 19.7 | 395 | | 20.6 | 213 | 18.2 | 0.12 |
| Age (mean, SD) | 18.92 | 0.68 | 18.91 | | 0.67 | 18.94 | 0.71 | 0.29 |
| Students from abroad (n, %) | 43 | 1.4 | 26 | | 1.4 | 17 | 1.5 | 0.75 |
| Resident status (n, %) |  |  |  | |  |  |  | 0.56 |
| Living with family and/or relatives | 1,750 | 56.7 | 1,074 | | 56 | 676 | 57.8 |  |
| Living alone or in dormitory | 1,321 | 42.8 | 835 | | 43.5 | 486 | 41.6 |  |
| Others or not responded | 17 | 0.6 | 10 | | 0.5 | 7 | 0.6 |  |
| Sleep time on weekdays (n, %) |  |  |  | |  |  |  | 0.65 |
| Less than 6 hours | 588 | 19.0 | 360 | | 18.8 | 228 | 19.5 |  |
| Between 6 and 8 hours | 2,314 | 74.9 | 1,448 | | 75.5 | 866 | 74.1 |  |
| 8 or more hours | 186 | 6.0 | 111 | | 5.8 | 75 | 6.4 |  |
| Sleep time on holidays (n, %) |  |  |  | |  |  |  | 0.78 |
| Less than 6 hours | 130 | 4.2 | 82 | | 4.3 | 48 | 4.1 |  |
| Between 6 and 8 hours | 2,035 | 65.9 | 1,272 | | 66.3 | 763 | 65.3 |  |
| 8 or more hours | 923 | 29.9 | 565 | | 29.4 | 358 | 30.6 |  |
| Exercise (n, %) |  |  |  | |  |  |  | 0.091 |
| No exercise | 674 | 21.8 | 440 | | 22.9 | 234 | 20.0 |  |
| Once a month | 969 | 31.4 | 591 | | 30.8 | 378 | 32.3 |  |
| Once a week | 1,137 | 36.8 | 686 | | 35.7 | 451 | 38.6 |  |
| Everyday | 305 | 9.9 | 199 | | 10.4 | 106 | 9.1 |  |
| NEO-FFI (mean, SD) |  |  |  | |  |  |  |  |
| Neuroticism | 25.7 | 8.37 | **26.06** | | **8.35** | **25.12** | **8.36** | **0.003** |
| Extraversion | 25.33 | 7.25 | 25.41 | | 7.38 | 25.18 | 7.05 | 0.40 |
| Openness | 30.51 | 5.97 | 30.63 | | 5.90 | 30.31 | 6.07 | 0.16 |
| Agreeableness | 29.58 | 6.21 | 29.61 | | 6.18 | 29.52 | 6.26 | 0.69 |
| Conscientiousness | 26.46 | 7.13 | **26.86** | | **7.16** | **25.81** | **7.04** | **<0.001** |
| K6 score (mean, SD) | 3.36 | 3.59 | **3.59** | | **3.72** | **2.98** | **3.32** | **<0.001** |
| Any PEs (n, %) | 154 | 5.0 | **118** | | **6.1** | **36** | **3.1** | **0.001** |
| AQ-10 score (mean, SD) | 4.43 | 2.15 | **4.50** | | **2.16** | **4.31** | **2.12** | **0.02** |
| SSQ6 (mean, SD) |  |  |  | |  |  |  |  |
| Number | 23.33 | 10.42 | 23.12 | | 10.38 | 23.68 | 10.47 | 0.15 |
| Satisfaction | 30.99 | 5.98 | 30.87 | | 5.99 | 31.18 | 5.96 | 0.15 |
| Previous service use (n, %) |  |  |  | |  |  |  |  |
| Psychiatric and psychological services | 166 | 5.4 | 108 | | 5.6 | 58 | 5.0 | 0.43 |
| Psychiatry | 85 | 2.8 | 56 | | 2.9 | 29 | 2.5 | 0.54 |
| Stigma measures (mean, SD) |  |  |  | |  |  |  |  |
| Feasible knowledge | 19.83 | 6.25 | 19.83 | | 6.25 | NA | NA | NA |
| Reported behaviors | 0.26 | 0.55 | 0.26 | | 0.55 | NA | NA | NA |
| Intended behaviors | 12.86 | 2.87 | 12.86 | | 2.87 | NA | NA | NA |
| Help-seeking intension | 3.68 | 0.90 | 3.68 | | 0.90 | NA | NA | NA |
| Easy to talk to others | 3.4 | 1.57 | 3.4 | | 1.57 | NA | NA | NA |
|  |  |  |  | |  |  |  |  |
| Follow-up status (n, %) |  |  |  | |  |  |  |  |
| Any follow-up available | 2,189 | 69.6 | **1,437** | | **74.9** | **752** | **64.3** | **<0.001** |
| Responses in annual HCs |  |  |  | |  |  |  | **<0.001** |
| Never | 957 | 31.0 | **518** | | **27.0** | **439** | **37.6** |  |
| 1 | 818 | 26.5 | **516** | | **26.9** | **302** | **25.8** |  |
| 2 | 618 | 20.0 | **396** | | **20.6** | **222** | **19.0** |  |
| 3 | 503 | 16.3 | **350** | | **18.2** | **153** | **13.1** |  |
| 4 | 192 | 6.2 | **139** | | **7.2** | **53** | **4.5** |  |
| HSC record | 253 | 8.2 | 172 | | 9.0 | 81 | 6.9 | 0.053 |
| Service use after admission |  |  |  | |  |  |  |  |
| Psychiatric and psychological services | 368 | 11.9 | **253** | | **13.2** | **115** | **9.8** | **0.006** |
| Psychiatric services | 282 | 9.1 | **193** | | **10.1** | **89** | **7.6** | **0.026** |

Abbreviations: NEO-FFI, NEO Five Factor Inventory; K6, Kessler 6 scale; PEs, psychotic experiences; AQ-10, 10-item short version of the Autism Spectrum Quotient scale; SSQ6, Social Support Questionnaire Short Form; MIDUS, Mental Illness and Disorder Understanding Scale; RIBS-J, Japanese version of the Reported and Intended Behavior Scale; HCs, health checkups; HSC, health service center.

# **Table 2. Cross-sectional logistic regression models for psychiatric and psychological service use.**

|  | **Crude** |  |  |  | **Stepwise adjusted** | | | |
| --- | --- | --- | --- | --- | --- | --- | --- | --- |
|  | **OR** | **95% CI** | | **p** | **OR** | **95% CI** | | **p** |
| Female (n, %) | **1.770** | **1.253** | **2.502** | **0.001** | **2.294** | **1.437** | **3.661** | **< 0.001** |
| Age (mean, SD) | **1.632** | **1.369** | **1.945** | **< 0.001** | **1.445** | **1.107** | **1.885** | **0.007** |
| Students from abroad (n, %) | 1.328 | 0.407 | 4.339 | 0.64 |  |  |  |  |
| Resident status (n, %) |  |  |  |  |  |  |  |  |
| Living with family and/or relatives | (ref) |  |  |  |  |  |  |  |
| Living alone or in dormitory | 1.328 | 0.967 | 1.825 | 0.080 |  |  |  |  |
| Sleep time on weekdays (n, %) |  |  |  |  |  |  |  |  |
| Less than 6 hours | 1.034 | 0.693 | 1.543 | 0.87 |  |  |  |  |
| Between 6 and 8 hours | (ref) |  |  |  |  |  |  |  |
| 8 or more hours | 1.239 | 0.671 | 2.287 | 0.49 |  |  |  |  |
| Sleep time on holidays (n, %) |  |  |  |  |  |  |  |  |
| Less than 6 hours | 0.409 | 0.128 | 1.307 | 0.13 | 0.267 | 0.060 | 1.193 | 0.084 |
| Between 6 and 8 hours | (ref) |  |  |  | (ref) |  |  |  |
| 8 or more hours | 1.018 | 0.724 | 1.432 | 0.92 | 1.075 | 0.680 | 1.699 | 0.76 |
| Exercise (n, %) |  |  |  |  |  |  |  |  |
| No exercise | **2.005** | **1.359** | **2.958** | **< 0.001** |  |  |  |  |
| Once a month | 1.013 | 0.670 | 1.530 | 0.95 |  |  |  |  |
| Once a week | (ref) |  |  |  |  |  |  |  |
| Everyday | 0.948 | 0.509 | 1.767 | 0.87 |  |  |  |  |
| NEO-FFI (mean, SD) |  |  |  |  |  |  |  |  |
| Neuroticism | **1.104** | **1.081** | **1.128** | **< 0.001** | **1.055** | **1.018** | **1.094** | **0.004** |
| Extraversion | **0.962** | **0.941** | **0.983** | **0.001** | **0.960** | **0.929** | **0.992** | **0.015** |
| Openness | **1.057** | **1.030** | **1.086** | **< 0.001** |  |  |  |  |
| Agreeableness | 0.981 | 0.956 | 1.005 | 0.12 |  |  |  |  |
| Conscientiousness | **0.976** | **0.955** | **0.997** | **0.028** |  |  |  |  |
| K6 score (mean, SD) | **1.216** | **1.175** | **1.258** | **< 0.001** | **1.142** | **1.075** | **1.212** | **< 0.001** |
| Any PEs (n, %) | **3.450** | **2.147** | **5.542** | **< 0.001** | 1.763 | 0.922 | 3.369 | 0.086 |
| AQ-10 score (mean, SD) | **1.149** | **1.069** | **1.236** | **< 0.001** | 0.916 | 0.820 | 1.023 | 0.12 |
| SSQ6 (mean, SD) |  |  |  |  |  |  |  |  |
| Number | **0.977** | **0.963** | **0.992** | **0.002** |  |  |  |  |
| Satisfaction | **0.958** | **0.936** | **0.979** | **< 0.001** | **0.962** | **0.930** | **0.995** | **0.024** |
| Stigma measures |  |  |  |  |  |  |  |  |
| Feasible knowledge | **0.945** | **0.915** | **0.975** | **< 0.001** |  |  |  |  |
| Reported behaviors | **1.939** | **1.499** | **2.509** | **< 0.001** | **1.560** | **1.133** | **2.149** | **0.006** |
| Intended behaviors | **1.098** | **1.025** | **1.177** | **0.008** | 1.062 | 0.986 | 1.144 | 0.12 |
| Help-seeking intension | **1.438** | **1.121** | **1.845** | **0.004** | **1.634** | **1.247** | **2.142** | **< 0.001** |
| Easy to talk to others | 1.063 | 0.942 | 1.199 | 0.32 | 1.118 | 0.978 | 1.277 | 0.10 |

Bold shows significant (*p* < .05).

# **Table 3. Logistic regression models for** **psychiatric and psychological service use after admission.**

|  | **Crude** |  |  |  | **Stepwise adjusted** | | | |
| --- | --- | --- | --- | --- | --- | --- | --- | --- |
|  | **OR** | **95% CI** | | **p** | **OR** | **95% CI** | | **p** |
| Female (n, %) | **1.591** | **1.237** | **2.048** | **< 0.001** | **1.988** | **1.416** | **2.790** | **< 0.001** |
| Age (mean, SD) | 1.048 | 0.889 | 1.234 | 0.58 |  |  |  |  |
| Students from abroad (n, %) | 1.060 | 0.436 | 2.577 | 0.90 |  |  |  |  |
| Resident status (n, %) |  |  |  |  |  |  |  |  |
| Living with family and/or relatives | (ref) |  |  |  | (ref) |  |  |  |
| Living alone or in dormitory | **1.438** | **1.147** | **1.803** | **0.002** | **1.425** | **1.056** | **1.924** | **0.021** |
| Sleep time on weekdays (n, %) |  |  |  |  |  |  |  |  |
| Less than 6 hours | 1.296 | 0.987 | 1.703 | 0.062 |  |  |  |  |
| Between 6 and 8 hours | (ref) |  |  |  |  |  |  |  |
| 8 or more hours | 1.301 | 0.824 | 2.055 | 0.26 |  |  |  |  |
| Sleep time on holidays (n, %) |  |  |  |  |  |  |  |  |
| Less than 6 hours | 1.572 | 0.945 | 2.617 | 0.082 |  |  |  |  |
| Between 6 and 8 hours | (ref) |  |  |  |  |  |  |  |
| 8 or more hours | 0.971 | 0.757 | 1.245 | 0.82 |  |  |  |  |
| Exercise (n, %) |  |  |  |  |  |  |  |  |
| No exercise | **1.608** | **1.206** | **2.144** | **0.001** |  |  |  |  |
| Once a month | 0.950 | 0.715 | 1.262 | 0.72 |  |  |  |  |
| Once a week | (ref) |  |  |  |  |  |  |  |
| Everyday | 1.196 | 0.792 | 1.806 | 0.40 |  |  |  |  |
| NEO-FFI (mean, SD) |  |  |  |  |  |  |  |  |
| Neuroticism | **1.061** | **1.046** | **1.077** | **< 0.001** |  |  |  |  |
| Extraversion | **0.950** | **0.935** | **0.966** | **< 0.001** | **0.962** | **0.940** | **0.985** | **0.001** |
| Openness | **1.034** | **1.014** | **1.054** | **0.001** | **1.036** | **1.008** | **1.064** | **0.011** |
| Agreeableness | **0.972** | **0.954** | **0.989** | **0.002** |  |  |  |  |
| Conscientiousness | **0.970** | **0.955** | **0.986** | **< 0.001** | 0.984 | 0.962 | 1.006 | 0.15 |
| K6 score (mean, SD) | **1.150** | **1.119** | **1.182** | **< 0.001** | **1.094** | **1.052** | **1.138** | **< 0.001** |
| Any PEs (n, %) | **2.564** | **1.701** | **3.863** | **< 0.001** |  |  |  |  |
| AQ-10 score (mean, SD) | **1.147** | **1.088** | **1.209** | **< 0.001** | 1.057 | 0.978 | 1.142 | 0.16 |
| SSQ6 (mean, SD) |  |  |  |  |  |  |  |  |
| Number | **0.981** | **0.971** | **0.992** | **0.001** | 0.985 | 0.969 | 1.001 | 0.070 |
| Satisfaction | **0.975** | **0.957** | **0.992** | **0.005** |  |  |  |  |
| The experience of service use | **6.648** | **4.589** | **9.630** | **< 0.001** | **4.627** | **2.788** | **7.678** | **< 0.001** |
| Stigma measures |  |  |  |  |  |  |  |  |
| Feasible knowledge | **0.970** | **0.949** | **0.992** | **0.008** |  |  |  |  |
| Reported behaviors | **1.276** | **1.012** | **1.609** | **0.040** |  |  |  |  |
| Intended behaviors | **1.088** | **1.036** | **1.143** | **0.001** | **1.060** | **1.003** | **1.120** | **0.037** |
| Help-seeking intension | 1.166 | 0.994 | 1.367 | 0.059 | **1.234** | **1.029** | **1.479** | **0.023** |
| Easy to talk to others | 1.016 | 0.932 | 1.106 | 0.723 | 1.076 | 0.974 | 1.188 | 0.15 |

Bold shows significant (*p* < .05).
